# Supplementary material
Source: PubMed Central journal article supplement (PMC5039078)
Supplement: NIHMS807942-supplement.pdf [file NIHMS807942-supplement.pdf]

**Table. 3 Included Articles: Enrollment and Retention in HIV Care**

| Author                                 | Intrapersonal Stream | Social Stream | Cultural-Attitudinal Stream |
|----------------------------------------|----------------------|---------------|-----------------------------|
| 1. Abdelrahman I, et al. 2013          |                      | SE, PI        |                             |
| 2. Addo-Atuah, J, et al.2012           | PS                   | SE, PI        | LD, OSB                     |
| 3. Agbonyitor M. 2009                  |                      | SE            | LD, QCE, OSB                |
| 4. Ahsan Ullah AK. 2011                | PS                   | SE, PI        | QCE, OSB                    |
| 5. Alemu T, et al. 2013                | IC                   |               | QCE, OSB                    |
| 6. Alfonso V, et al. 2009;             | IC                   | PI            | QCE                         |
| 7. Arrivillaga M, et al. 2011          |                      | SE            | LD                          |
| 8. Arrivillaga M, et al., 2012         | IC                   | SE            | OSB                         |
| 9. Audu B, et al., 2013                | PS                   | SE            | QCE, OSB                    |
| 10. Auvinen J, 2013                    | PS, IC               | SE            | LD, QCE                     |
| 11. Bhagwanjee A, et al.,2008          | PS,IC                |               | QCE, OSB                    |
| 12. Balcha TT, et al., 2011            |                      | SE            | LD, OSB                     |
| 13. Benotsch EG, et al. 2008           |                      | SE            | LD, OSB                     |
| 14. Beer L, et al, 2009                | PS, IC               | SE, PI        | QCE, OSB                    |
| 15. Blake BJ, et al. 2008              |                      | PI            | LD, QCE, OSB                |
| 16. Boehme AK, et al. 2012             |                      | PI            |                             |
| 17. Bogart LM, et al, 2013             | PS                   | PI            | LD, QCE                     |
| 18. Campbell C, et al, 2011            | IC                   | SE, PI        | QCE                         |
| 19. Chakrapani V, et al. 2011          |                      | PI            | QCE                         |
| 20. Chakrapani V, et al. 2009          | IC                   | PI            | QCE, OSB                    |
| 21. Chinkonde JR, et al.2009           | PS                   | SE, PI        | QCE                         |
| 22. Chomat AMB, et al.2009             | IC                   |               | OSB                         |
| 23. Church K, et al.2012               |                      | PI            | LD, QCE, OSB                |
| 24. Chow M. et al.2012                 |                      | PI, SE        | QCE                         |
| 25. Dahab M, et al.2011                | PS                   | PI, SE        | LD, QCE                     |
| 26. Dang BN, et al. 2012               |                      |               | LD, QCE, OSB                |
| 27. Dutcher MV, et al. 2011            | IC                   |               | QCE                         |
| 28. Enriquez M, et al.2013             | IC                   |               | OSB                         |
| 29. Fredriksen-Goldsen KI, et al. 2011 | PS                   | SE            |                             |
| 30. Garland PM, et al.2011             | PS, IC               | PI            | LD, OSB                     |
| 31. Ho C, et al. et al.2010            |                      | PI            | QCE                         |
| 32. Hodgson I, et al.2012              |                      | PI            | QCE                         |
| 33. Ibrahim K, et al.2011              | PS                   | SE, PI        | LD, QCE                     |
| 34. Johansen PS, and Kohli H.2012      |                      | SE            | QCE, OSB                    |
| 35. Joseph HA, et al.2011              | PS, IC               |               | LD                          |
| 36. Kasenga F, et al.2010              |                      | SE            | OSB                         |
| 37. Kempf M, et al.2010                |                      | PI            | QCE                         |
| 38. Lubega M, et al. 2010              | IC                   |               | LD, QCE, OSB                |
| 39. McCoy SI, et al.2009               | PS                   | SE            | QCE                         |
| 40. Moneyham L, et al.2010             | PS                   | SE            | QCE, OSB                    |
| 41. Muhamadi L, et al.2010             |                      | SE, PI        | QCE                         |
| 42. Mutchler MG, et al. 2011           | IC                   | PI            | QCE                         |

LINKAGE AND RETENTION IN HIV CARE (May2016)

|                                  |        |        |              |
|----------------------------------|--------|--------|--------------|
| 43. Nakigozi G, et al.2013       | IC, PS | SE, PI | LD, QCE, OSB |
| 44. Ndirangu EW & Evans C. 2009  |        | SE     | QCE          |
| 45. Njunga J, et al.2010         |        | SE     | OSB          |
| 46. O'Brien S. & Broom A.2013    |        | SE     | OSB          |
| 47. Odlum M, et al. 2012         | IC     | PI     | QCE, OSB     |
| 48. Orner P, et al.2008          |        | PI     | QCE, OSB     |
| 49. Peltzer K, et al. 2010       |        | PI     | QCE, OSB     |
| 50. Phakathi Z, et al. 2011      | IC     | SE     | QCE          |
| 51. Quinlivan EB, et al.2013     | IC, PS | SE, PI | LD, QCE      |
| 52. Rajabiun S, et al. 2011      | IC     | SE, PI | QCE, OSB     |
| 53. Rivero-Mendez M, et al.2010  | IC     | PI     |              |
| 54. Schrader SM, et al.2011      | PS     | PI, SE | LD           |
| 55. Shedlin MG, et al. 2013      | PS     |        | QCE, OSB     |
| 56. Shin S, et al. 2011          | PS     | SE, PI | QCE          |
| 57. Shuster JM, et al.2009       |        |        | OSB          |
| 58. Shroufi A, et al.2013        | PS, IC | SE,    | OSB          |
| 59. Sison N, et al.2013          |        | PI     | QCE, OSB     |
| 60. Stevens PE & Keigher SM.2009 |        |        | LD, QCE, OSB |
| 61. Theilgaard ZP, et al.2011    | IC     | SE     | QCE          |
| 62. Tripathi V, et al.2013       |        | PI     | QCE, OSB     |
| 63. Xavier J, et al.2012         |        | PI     | OSB          |
| 64. Yeap AD, et al.2010          | PS     | SE     | QCE, OSB     |
| 65. Wang X, et al.2011           |        | PI     | QCE, OSB     |
| 66. Ware NC, et al.2013          |        | SE, PI | QCE, LD      |
| 67. Wei C, et al.2013            | IC     |        | LD, QCE, OSB |
| 68. Williams B, et al.2011       | IC, PS | SE, PI | LD, OSB      |
| 69. Winestone LE, et al.2012     | IC     | SE     | QCE, OSB     |

(Abbreviations: PS - Psychological State, IC - Informational Challenges, SE- Societal Experiences, PI - Provider Interaction, LD - Life Demands, QCE - Quality of care Experiences, OSB - Other Structural Barriers)
